# Supplementary material for: Overexpression of WAX INDUCER1/SHINE1 Gene Enhances Wax Accumulation under Osmotic Stress and Oil Synthesis in Brassica napus
Source: PubMed Central journal article supplement (PMC6771042; doi:10.3390/ijms20184435), 2019-09-09
Supplement: ijms-20-04435-s001.pdf [file ijms-20-04435-s001.pdf]

**Supplementary Table 1.** Primers used in this study

| Primer name                         | Primer sequence (5' → 3')         | Purpose                  |
|-------------------------------------|-----------------------------------|--------------------------|
| RT- <i>Bnactin</i> -F               | TGTTCCCTGGAATTGCTGACCGTA          | Real-time PCR            |
| RT- <i>Bnactin</i> -R               | TGCGACCACCTTGATCTTCATGCT          |                          |
| <i>BnWIN1</i> -RT-F                 | CCCGTCAACAACAACAACAAC             |                          |
| <i>BnWIN1</i> -RT-R                 | TAGCGCTGAGGATAGAAGAGAG            |                          |
| <i>BnBCCP1</i> -RT-F                | TTCTACTCCTGCCTCTTCACCT            |                          |
| <i>BnBCCP1</i> -RT-R                | TTGCCCTTCTGCACTTTGT               |                          |
| <i>BnLPAT5</i> -RT-F                | TTCTACTCCAGTGGCCATTTCC            |                          |
| <i>BnLPAT5</i> -RT-R                | GATTGAAATGTGTAGCGGAGGC            |                          |
| <i>BnDGAT2</i> -RT-F                | GCTGGAGAGAGAGTTGAAGGAAG           |                          |
| <i>BnDGAT2</i> -RT-R                | CGAAGACAACACAAGAAGTGGG            |                          |
| <i>BnCER1</i> -RT-F                 | GGGTCTCATGAACCAAGGGG              |                          |
| <i>BnCER1</i> -RT-R                 | AGCAGAGGCGATGGTGTATG              |                          |
| <i>BnKCS1</i> -RT-F                 | GACCGATGGTTCTTCCTTTGTC            |                          |
| <i>BnKCS1</i> -RT-R                 | TCGTCGAGAACCGCACTAC               |                          |
| <i>BnGPAT9</i> -RT-F                | TGTTGACGCCTTCTGGAATAG             |                          |
| <i>BnGPAT9</i> -RT-R                | TCCAAGTACCACACTTCACATAC           |                          |
| <i>BnLACS2</i> -RT-F                | TGTTGCTGTGCGAAAACCTCG             |                          |
| <i>BnLACS2</i> -RT-R                | CTCTCGGGTACAACCACTGC              |                          |
| <i>BnKCR1</i> -RT-F                 | CTCCGACTCGATTCAAGCCA              |                          |
| <i>BnKCR1</i> -RT-R                 | TACGAAACCCAGCGTTGTT               |                          |
| EMSA- <i>P<sub>BnBCCP1</sub></i> -F | TTGCCTCTAAAGTATATACAACCTGAACATC   | Target DNA amplification |
| EMSA- <i>P<sub>BnBCCP1</sub></i> -R | AATCTGTTTTCTTGTGTGTCGGCTATTT TTC  |                          |
| EMSA- <i>P<sub>DGAT2</sub></i> -F   | TGCGTCTGGCAGAGGATTGTCAATGTTTTT    |                          |
| EMSA- <i>P<sub>DGAT2</sub></i> -R   | GGGAAGAAGATTTTGAGTCGGTTTGGGTTT    |                          |
| EMSA- <i>P<sub>GPAT9</sub></i> -F   | GGTTTGGTCGGGCTTGCCTCTAAGGTTTAC    |                          |
| EMSA- <i>P<sub>GPAT9</sub></i> -R   | ATGCGTAAAATCAAGCCCGGTAGAGGTC      |                          |
| EMSA- <i>P<sub>LPAT5</sub></i> -F   | ATTGTATTCTGATTCTTTCTGTAAGTTTGC    |                          |
| EMSA- <i>P<sub>LPAT5</sub></i> -R   | AGAAAAAATGAACAGCCGACCATAATAATC    |                          |
| <i>GPAT9</i> -OE-F                  | GGATCCTCTAGAATGAGCAGCACGGCAGGAA   | <i>GPAT9</i> -OE cloning |
| <i>GPAT9</i> -OE-F                  | GAGCTCGGATCCTCACTTGTCTTCCAATCTAGC |                          |
